# Supplementary material for: Hyperactivated ZBP1-Mediated Necroptosis Exacerbates Pneumonia in Mice Co-Infected with Low-Lethality H1N1 and HCoV-229E
Source: Research Square preprint supplement (doi:10.21203/rs.3.rs-7426580/v1), 2025-09-01
Supplement: Supplementary file 1 [file f22f091679b0ffa845e16359.xlsx]

## Sheet: Primers
Supplementary Table 1
Primers Squence List:
IAV M gene	Forward	5'-GACCGATCCTGTCACCTCTGAC-3'
	Reverse	5'-AGGGCATTCTGGACAAAGCGTCTA-3'
HCoV M gene	Forward	5'-TGGCCCCATTAAAAATGTGT-3'
	Reverse	5'-CCTGAACACCTGAAGCCAAT-3'
IFN-α	Forward	5'-TACTCAGCAGACCTTGAACCT-3'
	Reverse	5'-CAGTCTTGGCAGCAAGTTGAC-3'
IFN-β	Forward	5'-CAGCTCCAAGAAAGGACGAAC-3'
	Reverse	5'-GGCAGTGTAACTCTTCTGCAT-3'
TNF-α	Forward	5'-CATCTTCTCAAAATTCGAGTGACAA-3'
	Reverse	5'-TGGGAGTAGACAAGGTACAACCC-3'
IL-1β	Forward	5'-TGCCACCTTTTGACAGTGATG-3'
	Reverse	5'-TGATGTGCTGCTGCTGCGAGATT-3'
IL-6	Forward	5'-AGCCTCCGACTTGTGAAGTG-3'
	Reverse	5'-CTGATGCTGGTGACAACCAC-3'
GAPDH	Forward	5'-CATGTTCGTCATGGGGTGAACCA-3'
	Reverse	5'-AGTGATGGCATGGACTGTGGTCAT-3'
β-actin	Forward	5'-CATTGCTGACAGGATGCAGAAGG-3'
	Reverse	5'-TGCTGGAAGGTGGACAGTGAGG-3'
ZBP1	Forward	5'-AAGAGTCCCCTGCGATTATTTG-3'
	Reverse	5'-TCTGGATGGCGTTTGAATTGG-3'
RIPK3	Forward	5'-CAGTGGGACTTCGTGTCCG-3'
	Reverse	5'-CAAGCTGTGTAGGTAGCACATC-3'
MLKL	Forward	5'-CATTGCTGACAGGATGCAGAAGG-3'
	Reverse	5'-TGCTGGAAGGTGGACAGTGAGG-3'
